# Supplementary material for: Substrate channel evolution of an esterase for the synthesis of cilastatin
Source: Royal Society of Chemistry journal article supplement (doi:10.1039/c5cy00085h), 2015-01-01
Supplement: c5cy00085h1.pdf [file c5cy00085h1.pdf]

## Supporting Information for:

### 5 Substrate channel evolution of an esterase for the synthesis of Cilastatin

Zheng-Jiao Luan,<sup>a</sup> Fu-Long Li,<sup>a</sup> Shuai Dou,<sup>a</sup> Qi Chen,<sup>a</sup> Xu-Dong Kong,<sup>a</sup> Jiahai Zhou,<sup>b</sup> Hui-Lei Yu<sup>\*a</sup> and Jian-He Xu<sup>\*a</sup>

10 <sup>a</sup> State Key Laboratory of Bioreactor Engineering and Shanghai Collaborative Innovation Centre for Biomanufacturing, East China University of Science and Technology, Shanghai 200237, China. E-mail: huileiyu@ecust.edu.cn or jianhexu@ecust.edu.cn; Fax: +86-21-6425-0840; Tel: +86-21-6425-2498  
<sup>b</sup> State Key Laboratory of Bio-organic and Natural Products Chemistry, Shanghai Institute of Organic Chemistry, Chinese Academy of Sciences, Shanghai 200032, China.

#### 15 Contents

**Table S1.** Primers used for site-directed mutagenesis.

**Table S2.** Data collection and refinement statistics of *RhEst1*.

**Fig. S1** <sup>1</sup>H NMR spectrum of product (*S*)-(+)-DmCpCa.

**Table S1.** Primers used for site-directed mutagenesis.

| Library   | Primers     | Oligonucleotide sequences (5'-3') <sup>a</sup> |
|-----------|-------------|------------------------------------------------|
| Library A |             |                                                |
|           | I128-F      | TGGTCGGGGCGNDTACCAGCNDTGGGCGCG                 |
|           | I128-R      | CGCGCCCAHNGCTGGTAHNCGCCCGACCA                  |
|           | I131-F      | TGGTCGGGGCGNDTACCAGCNDTGGGCGCG                 |
|           | I131-R      | CGCGCCCAHNGCTGGTAHNCGCCCGACCA                  |
|           | G138-F      | GCGAAAAAGGTNNKAAGGTCGGCTCGGCGA                 |
|           | G138-R      | TCGCCGAGCCGACCTTMNNACCTTTTCGC                  |
|           | V140-F      | GCGAAAAAGGTGGCAAGNNKGGCTCGGCGA                 |
|           | V140-R      | GCGCTACGCATCGCCGAGCCMNNCTTGCCACCTTTT           |
|           | M144-F      | TGGCAAGGTCGGCTCGGCGNNKCGTAGCGCAGTCCCCGGC       |
|           | M144-R      | GCCGGAACTGCGCTACGMNNCGCCGAGCCGACCTTGCCA        |
|           | A147/V148-F | TGCGTAGCNDTNDTCCCGGCGCGATGTCCG                 |
|           | A147/V148-R | GCCGGGAHNAHNGCTACGCATCGCCGAGCC                 |
|           | F200-F      | GGGTGCGCGCAGCACTGNNKAACCGTGCTGTCGG             |
|           | F200-R      | TCGTGACCGACAGCACGGTTMNNCAGTGCTGCGCG            |
|           | V227/V228-F | CACGGAACCGACGACTCCNDTNDTGACGTG                 |
|           | V227/V228-R | TACCTGCGCTCACGTCAHNAHNGGAGTCGT                 |
| Library B |             |                                                |
|           | W33/A34-F   | GGTGTGCTGCACGGCTGGNDTNDTTCCTCGCAG              |
|           | W33/A34-R   | CCAGCACTGCGAGGAHNAHNCCAGCCGTG                  |
|           | W100-F      | ACGCGATCCTGCTCGGCNNKTCGTACGGCG                 |
|           | W100-R      | ATCACCAGACCGCCGTACGAMNNGCCGAGC                 |
|           | F166-F      | CGTGCACTCGGCGCTNNKGGCAATGCTCTCACC              |
|           | F166-R      | GGTGAGAGCATTGCCMNNAGCGCCGAGTGCACG              |
|           | L170-F      | GCTTTCGGCAATGCTNNKACCGGCCACCCGA                |
|           | L170-R      | TCGGGTGGGCCGGTMNNAGCATTGCCGAAAGC               |
|           | L184-F      | GGGTGCAGCGTCGCAGGCCNNKTTCGGGTA                 |
|           | L184-R      | CGAGAGGCTGTACCCGAAMNNGGCCTGCGA                 |

<sup>a</sup> The nucleotide sequences corresponding to the mutated amino acids are underline.

**Table S2.** Data collection and refinement statistics of *RhEst1*.

| <b>Data collection</b>                                     | <b><i>RhEst1-native</i></b> | <b><i>Se-RhEst1</i></b> |
|------------------------------------------------------------|-----------------------------|-------------------------|
| Wavelength (Å)                                             | 1.5418                      | 0.98                    |
| Space group                                                | $C_2$                       | $P_{3121}$              |
| a (Å)                                                      | 213                         | 96.0                    |
| b (Å)                                                      | 45.4                        | 96.0                    |
| c (Å)                                                      | 77.4                        | 206                     |
| $\alpha, \beta, \gamma$ (°)                                | 90, 106, 90                 | 90, 90, 120             |
| Resolution rang (Å) <sup>a</sup>                           | 44.3-1.95 (2.02-1.95)       | 35.1-2.40 (2.49-2.40)   |
| Total/Unique reflections                                   | 52476 / 13119               | 43537 / 3721            |
| Redundancy <sup>a</sup>                                    | 4 (3.8)                     | 11.7 (11.9)             |
| Average $(I/\delta)$ <sup>a</sup>                          | 15.33 (2.3)                 | 46.27 (13.4)            |
| Completeness (%) <sup>a</sup>                              | 100 (100)                   | 99.9 (100)              |
| Rmerge (%) <sup>b</sup>                                    | 0.043 (0.594)               | 0.082 (0.514)           |
| <b>Refinement</b>                                          | <b><i>RhEst1-native</i></b> | <b><i>Se-RhEst1</i></b> |
| Resolution range (Å)                                       | 44.35-1.95                  | 35.09-2.40              |
| No. of reflections                                         | 49674                       | 42836                   |
| R-factor <sup>c</sup> , R <sub>free</sub> (%) <sup>c</sup> | 0.1650, 0.2155              | 0.2504, 0.2861          |
| No. of amino acid residues                                 | 830                         | 539                     |
| No. of water                                               | 592                         | 291                     |
| Rmsd bond lengths (Å)                                      | 0.007                       | 0.010                   |
| Rmsd bond angles (°)                                       | 1.059                       | 1.303                   |
| Favored (%)                                                | 95.9                        | 96.61                   |
| Allowed (%)                                                | 3.5                         | 2.64                    |
| Disallowed (%)                                             | 0.6                         | 0.75                    |

<sup>a</sup> Numbers in parentheses are values for the highest-resolution shell.

<sup>b</sup>  $R_{\text{merge}} = \sum_{hkl} |I_i - I_m| / \sum_{hkl} I_m$ , where  $I_i$  and  $I_m$  are the observed intensity and the mean intensity of related reflections, respectively. Values in parentheses indicate high-resolution shell.

<sup>c</sup> R-factor =  $\sum ||F_o - F_c| / \sum |F_o|$ , R<sub>free</sub> =  $\sum_T ||F_o - F_c| / \sum_T |F_o|$ , where T is a test data set of 5% of the total reflections randomly chosen and set aside prior to refinement.

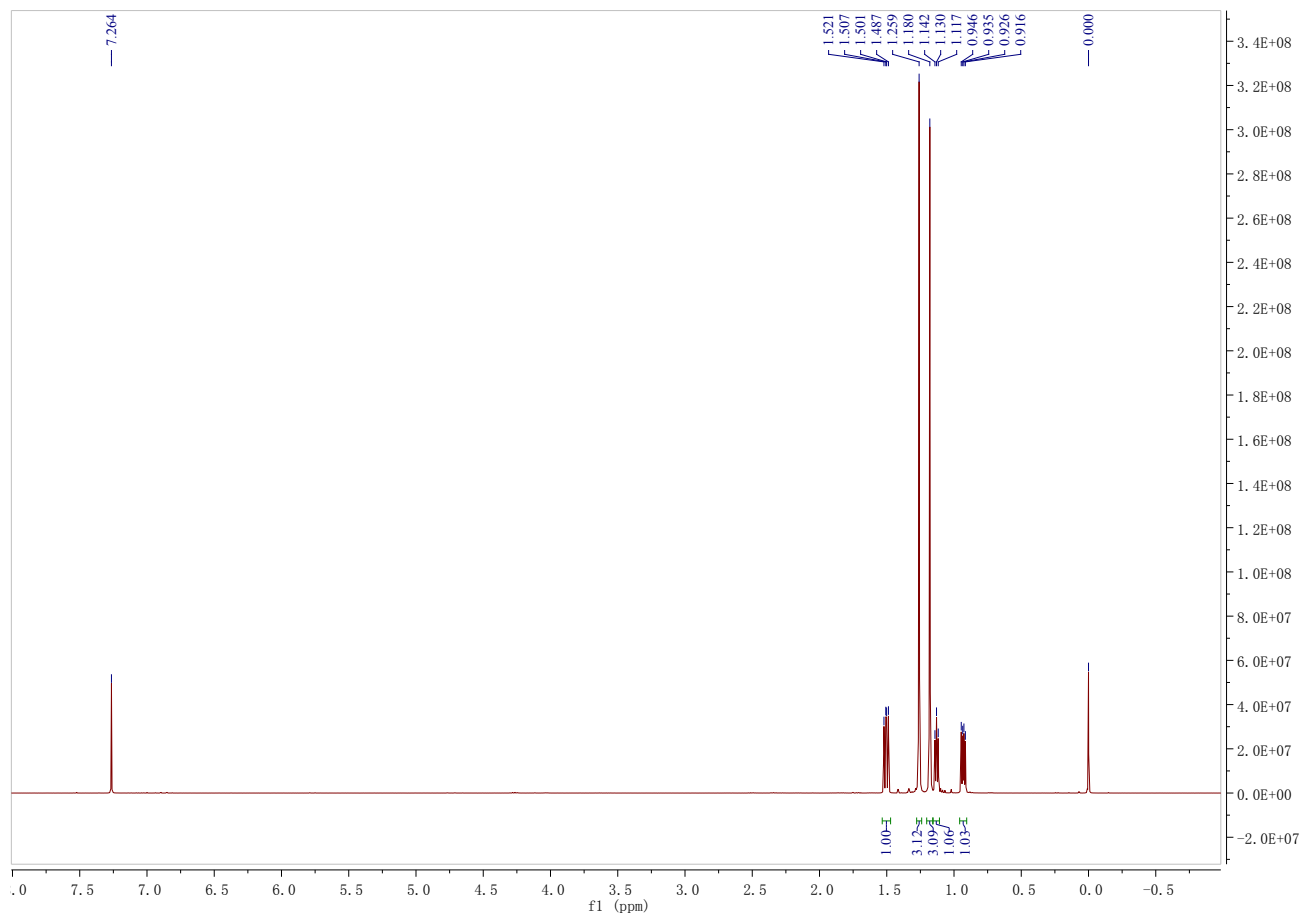

<sup>1</sup>H NMR (400 MHz, CDCl<sub>3</sub>), δ/ppm: 0.92-0.95 (m, 1H, CH), 1.11-1.14 (t, 1H, CH, J = 5.1 Hz), 1.18 (s, 3H, CH<sub>3</sub>), 1.26 (s, 3H, CH<sub>3</sub>), 1.48-1.52 (m, 1H, CH).

**Fig. S1** <sup>1</sup>H NMR spectrum of product (S)-(+)-DmCpCa.
